# Supplementary material for: 1D CdS nanowire–2D BiVO4 nanosheet heterostructures toward photocatalytic selective fine-chemical synthesis
Source: Royal Society of Chemistry journal article supplement (doi:10.1039/c4ra16397d), 2015-01-01
Supplement: c4ra16397d1.pdf [file c4ra16397d1.pdf]

# *Electronic Supplementary Information*

## **1D CdS nanowires-2D BiVO<sub>4</sub> nanosheets heterostructures toward photocatalytic selective fine-chemical synthesis**

Bin Han,<sup>a</sup> Siqi Liu,<sup>a,b</sup> Yi-Jun Xu,<sup>a,b</sup> and Zi-Rong Tang\*<sup>a</sup>

<sup>a</sup> College of Chemistry, New Campus, Fuzhou University, Fuzhou, 350108, P.R. China.

<sup>b</sup> State Key Laboratory of Photocatalysis on Energy and Environment, College of Chemistry

Fuzhou University, Fuzhou, 350002, P.R. China

Tel. /Fax: +86 591 22866126 E-mail: [zrtang@fzu.edu.cn](mailto:zrtang@fzu.edu.cn)

### **Experimental section**

#### **(1) Preparation of CdS nanowires**

Uniform CdS NWs were grown through a modified method,<sup>S1-S2</sup> as generalized in **Scheme S1**. In a typical process, 2.248 g of cadmium diethyldithiocarbamate (Cd(S<sub>2</sub>CNEt<sub>2</sub>)<sub>2</sub>), prepared by precipitation from a stoichiometric mixture of sodium diethyldithiocarbamate trihydrate and cadmium chloride in deionized water, was added to a Teflon-lined stainless steel autoclave with a capacity of 100 mL. Then, the autoclave was filled with 80 mL of ethylenediamine to about 80% of the total volume. The autoclave was maintained at 453 K for 24 h and subsequently allowed to cool to room temperature. A yellowish precipitate was collected and washed with absolute ethanol and deionized water to remove residue of organic solvents. The final products were dried in oven at 333 K for 12 h.<sup>S1-S2</sup>

#### **(2) Fabrication of BiVO<sub>4</sub> nanosheets**

The protocol of preparing BiVO<sub>4</sub> nanosheets is modified from the previously reported method,<sup>S3</sup> as displayed in **Scheme S2**. Briefly, 0.485 g of Bi(NO<sub>3</sub>)<sub>3</sub>·5H<sub>2</sub>O and 0.250 g of C<sub>18</sub>H<sub>29</sub>NaO<sub>3</sub>S (SDBS) were initially dissolved in 10 mL of 4 M HNO<sub>3</sub> solution and the resultant solution was marked as A solution. Simultaneously, 0.117 g of NH<sub>4</sub>VO<sub>3</sub> was added to 10 mL of 2 M NaOH solution, and the resultant solution was marked as B solution. Then, B solution was added into the A solution drop by drop under vigorous stirring. After 0.5 h, the pH value of the mixed solution was adjusted to 6.5 by 2 M NaOH solution. After another 0.5 h, the resultant solution was sealed in a 50 mL Teflon-lined stainless steel autoclave. The autoclave was heated to 433 K and maintained for 1 h, and then allowed to cool to room temperature. The vivid yellow precipitate was collected after centrifugation, washed with distilled water and absolute alcohol, and then dried at 373 K for 4 h.

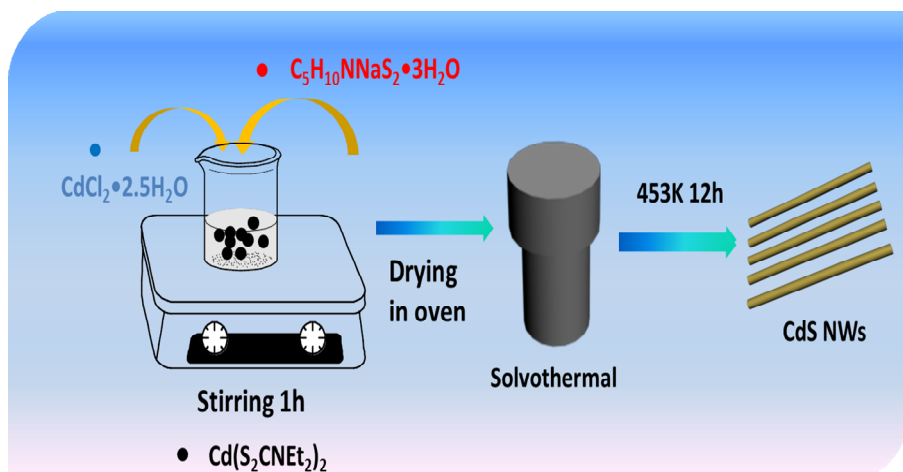

**Scheme S1.** Schematic flowchart for preparation of CdS NWs.

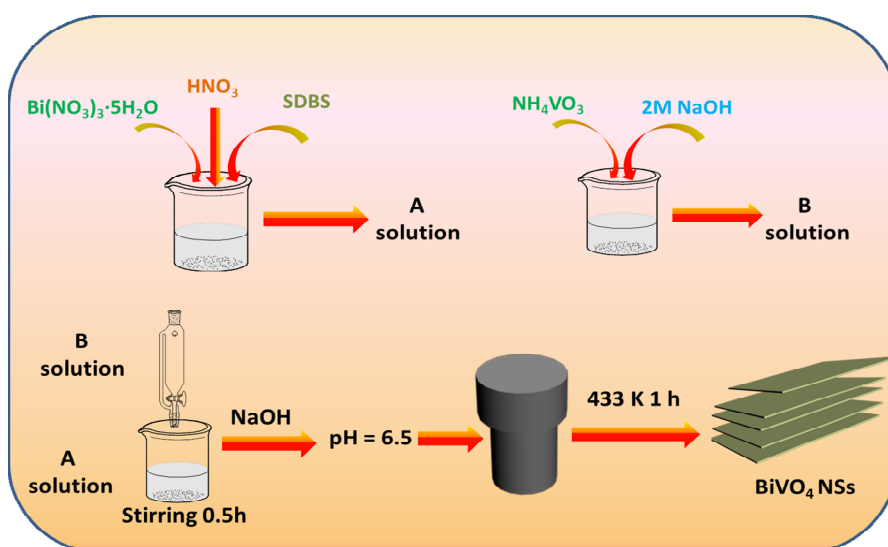

**Scheme S2.** Schematic flowchart for synthesis of  $BiVO_4$  NSs.

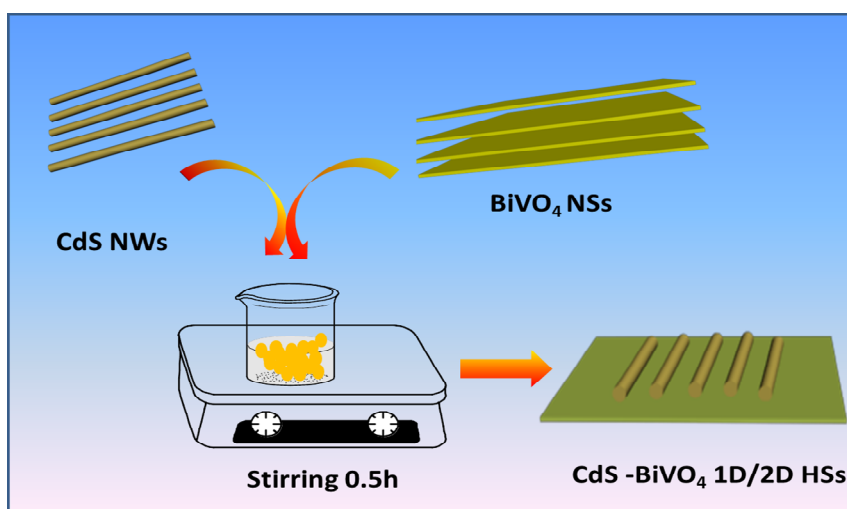

**Scheme S3.** The overall sketch for preparation of  $CdS - BiVO_4$  1D/2D HSs.

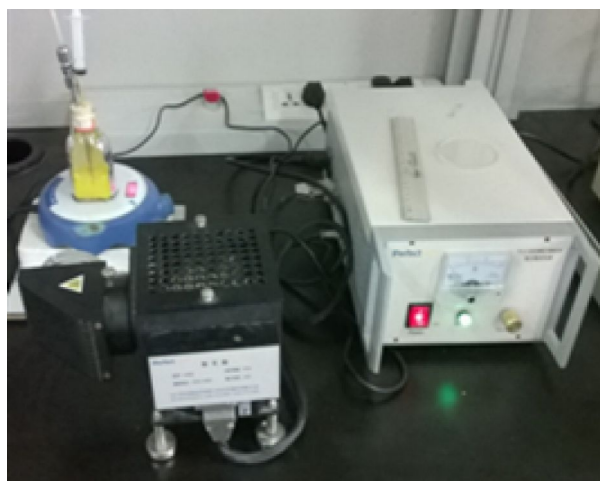

**Fig. S1** Photograph of the experimental setup for photocatalytic activity testing.

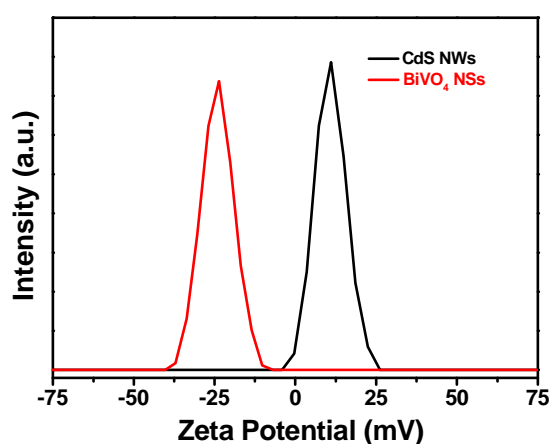

**Fig. S2** The zeta potentials ( $\xi$ ) of CdS NWs and BiVO<sub>4</sub> NSs aqueous dispersion.

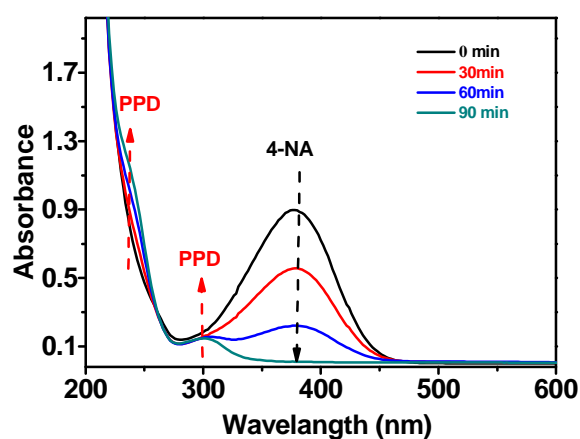

**Fig. S3** Time-dependent UV-vis spectral variation during the photocatalytic reduction of 4-nitroaniline (4-NA) to *p*-phenylenediamine (PPD) over CdS-1% BiVO<sub>4</sub> 1D/2D HSs under visible light irradiation ( $\lambda > 420$  nm) with the addition of ammonium oxalate as a quencher for photo-generated holes and N<sub>2</sub> purge at room temperature in the aqueous phase.

**Note:** The peak located at 380 nm is attributed to 4-NA and the peaks at 300 nm and 240 nm are ascribed to PPD.

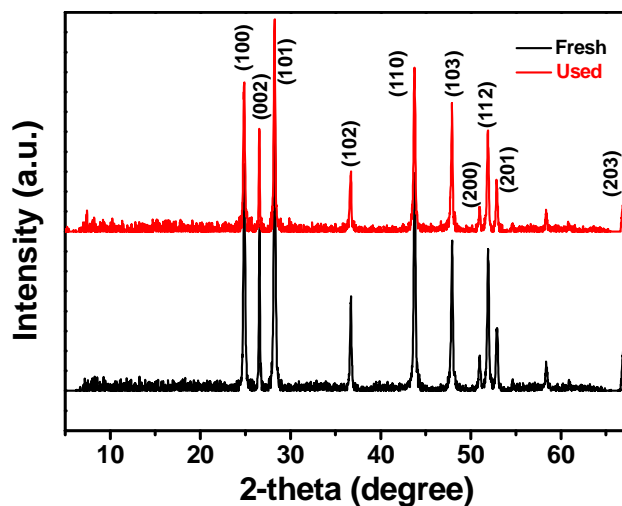

**Fig. S4** XRD patterns of CdS-1% BiVO<sub>4</sub> 1D/2D HSs before and after photo-reduction of 4-NA.

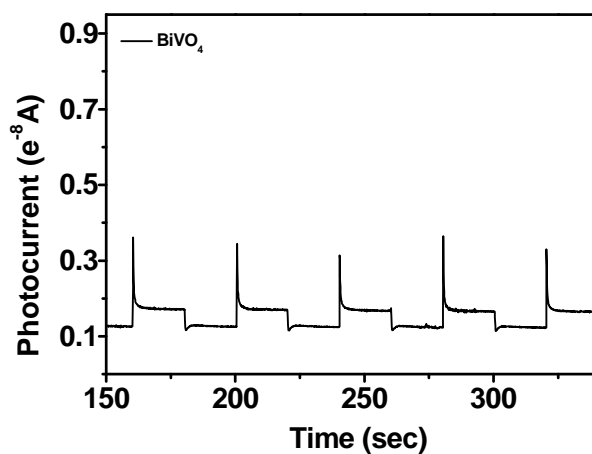

**Fig. S5** Transient photocurrent-time (I-t) curves of blank BiVO<sub>4</sub> NSs under visible light irradiation ( $\lambda > 420$  nm).

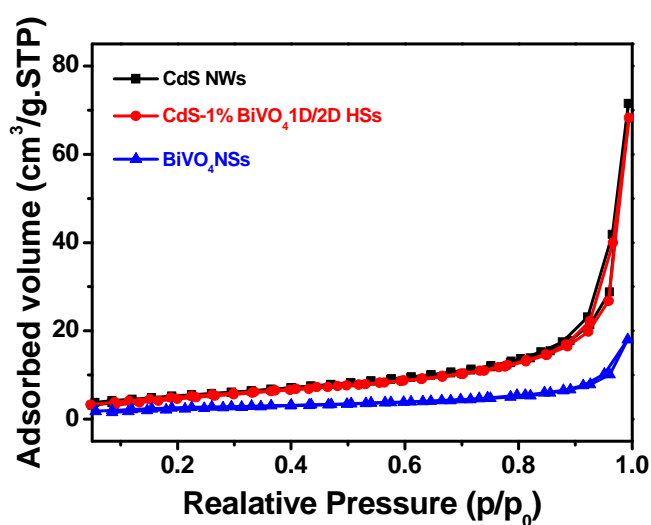

**Fig. S6** Nitrogen adsorption-desorption isotherm of the blank CdS NWs, BiVO<sub>4</sub> NSs and CdS-1% BiVO<sub>4</sub> 1D/2D HSs.

**Table S1** Summary of surface area, pore volume and pore size of the as-prepared CdS NWs, BiVO<sub>4</sub> NSs and CdS-1% BiVO<sub>4</sub> 1D/2D HSs.

| Samples                            | $S_{\text{BET}}$<br>(m <sup>2</sup> /g) <sup>a</sup> | Total pore volume<br>(cm <sup>3</sup> /g) <sup>b</sup> | Average pore size<br>(nm) <sup>c</sup> |
|------------------------------------|------------------------------------------------------|--------------------------------------------------------|----------------------------------------|
| CdS NWs                            | 20.59                                                | 0.11                                                   | 21                                     |
| BiVO <sub>4</sub> NSs              | 9.13                                                 | 0.03                                                   | 17                                     |
| CdS-1% BiVO <sub>4</sub> 1D/2D HSs | 18.28                                                | 0.11                                                   | 23                                     |

<sup>a</sup> BET surface area is calculated from the linear part of the BET plot.

<sup>b</sup> Single point total pore volume of the pores at P/P<sub>0</sub> = 0.99.

<sup>c</sup> Adsorption average pore width (4V/A by BET).

## References

- S1. S. Liu, Z. Chen, N. Zhang, Z.-R. Tang and Y.-J. Xu, *J. Phys. Chem. C*, 2013, **117**, 8251-8261.
- S2. L. Wang, H. Wei, Y. Fan, X. Gu and J. Zhan, *J. Phys. Chem. C*, 2009, **113**, 14119-14125.
- S3. L. Zhang, D. Chen and X. Jiao, *J. Phys. Chem. B*, 2006, **110**, 2668-2673.
